# Supplementary material for: The Global Streamflow Indices and Metadata Archive (GSIM) – Part 1: The production of daily streamflow archive and metadata
Source: Copernicus journal article supplement (doi:10.5194/essd-2017-103), 2017-09-20
Supplement: Supplementary file [file essd-2017-103-AC2-supplement.pdf]

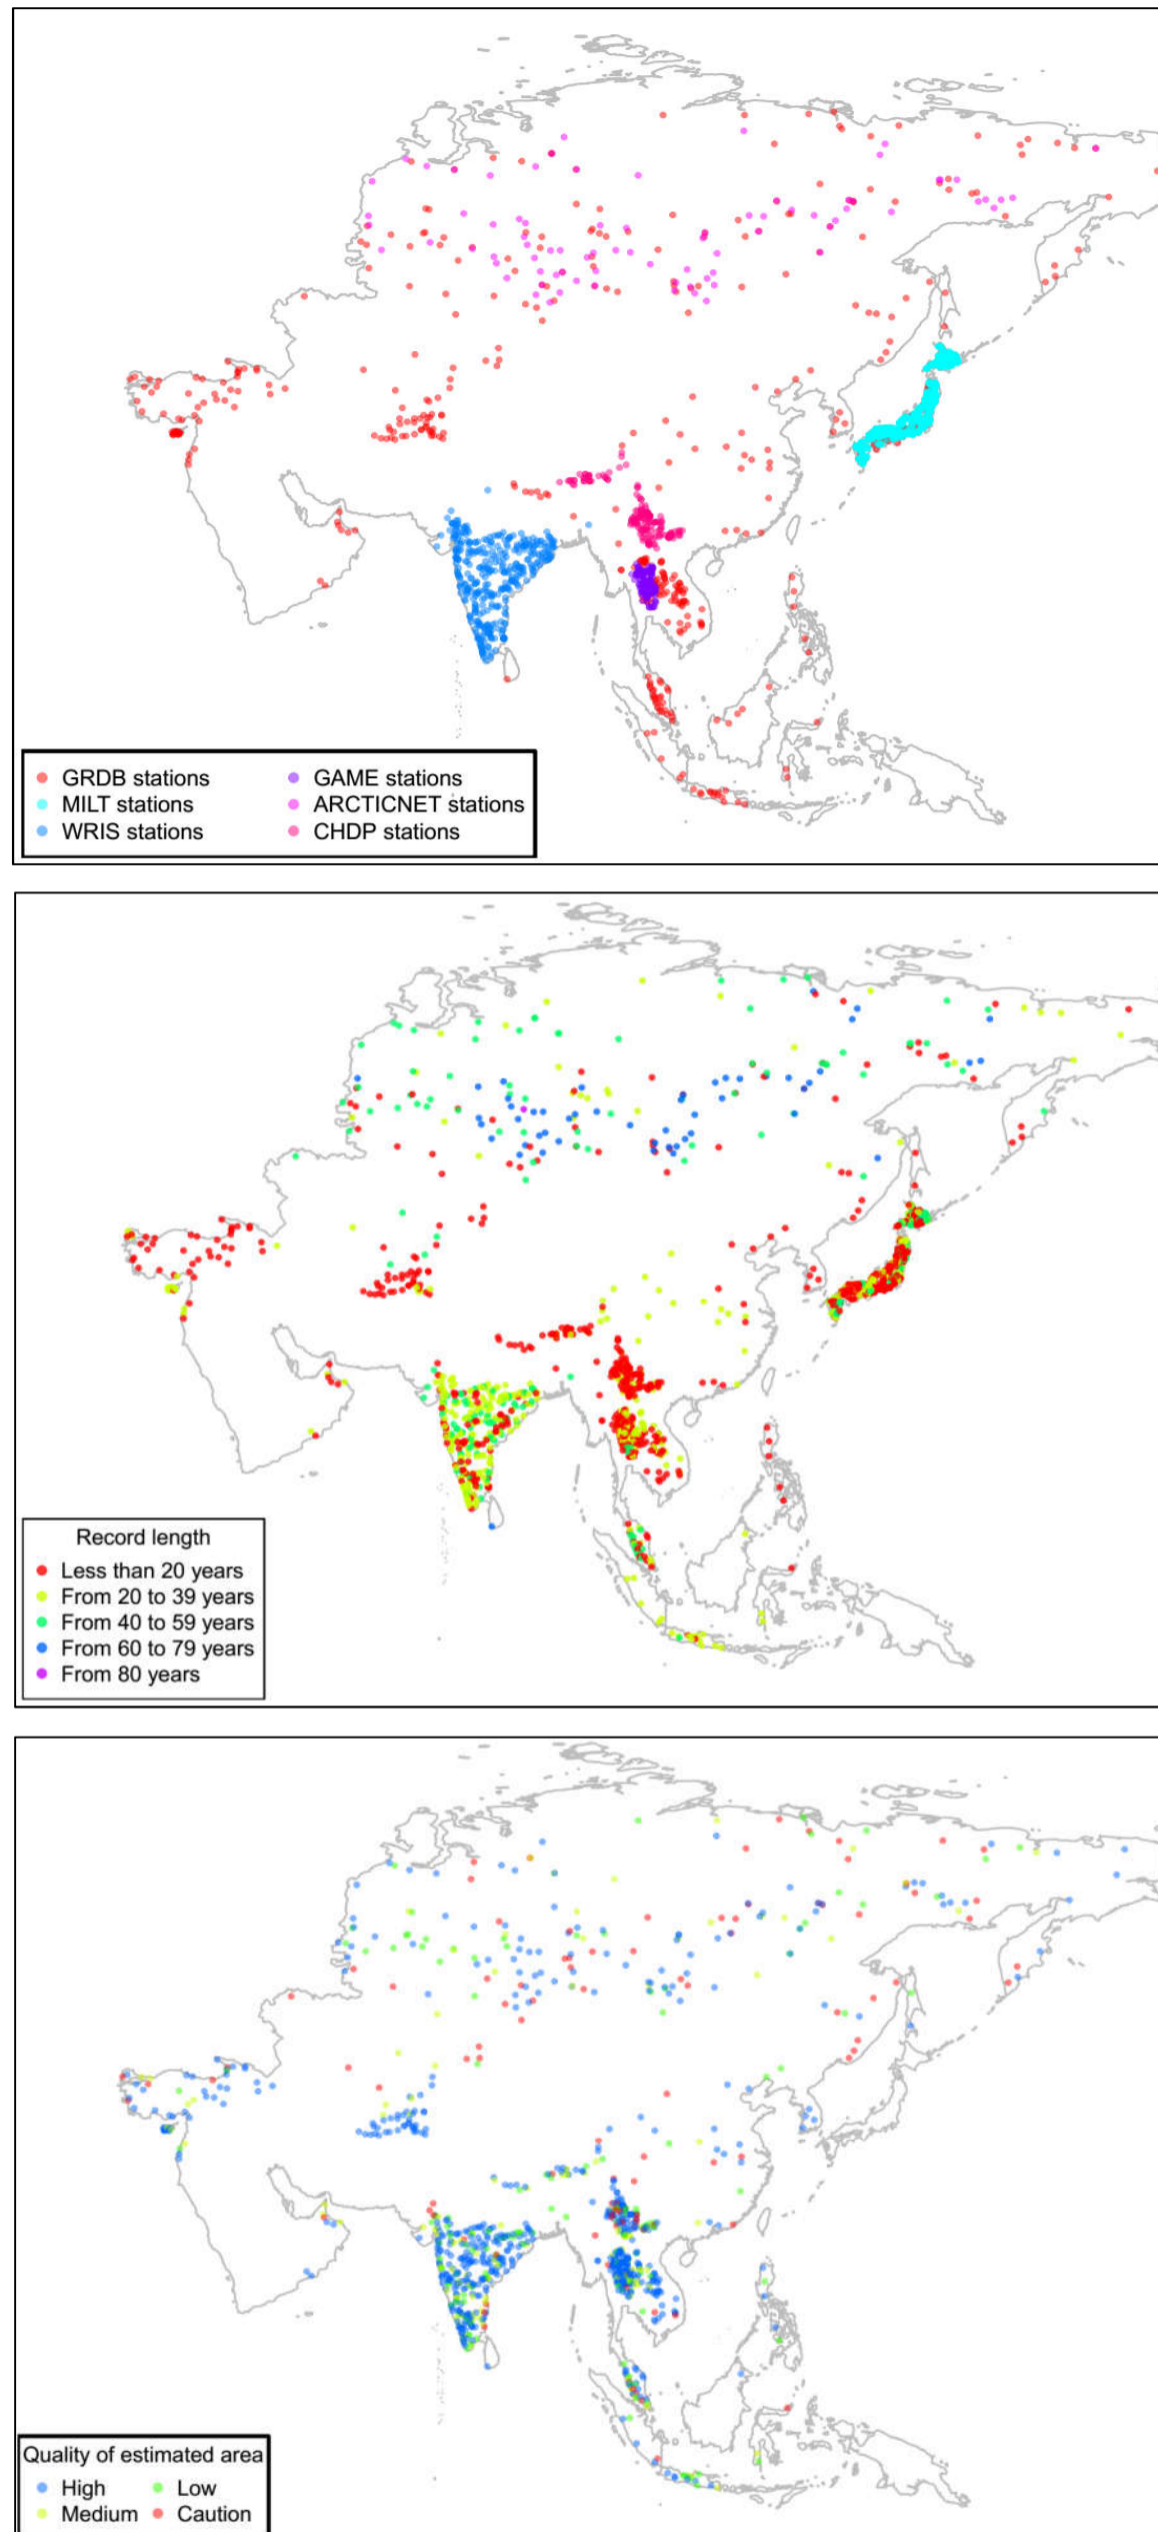

**Figure 1.** Overview of GSIM data product over Asia. Top panel: data sources for GSIM; middle panel: length of time series in GSIM database; lower panel: quality of catchment based on discrepancy between the reported catchment area and the delineated catchment area (only stations with reported catchment area have been shown).

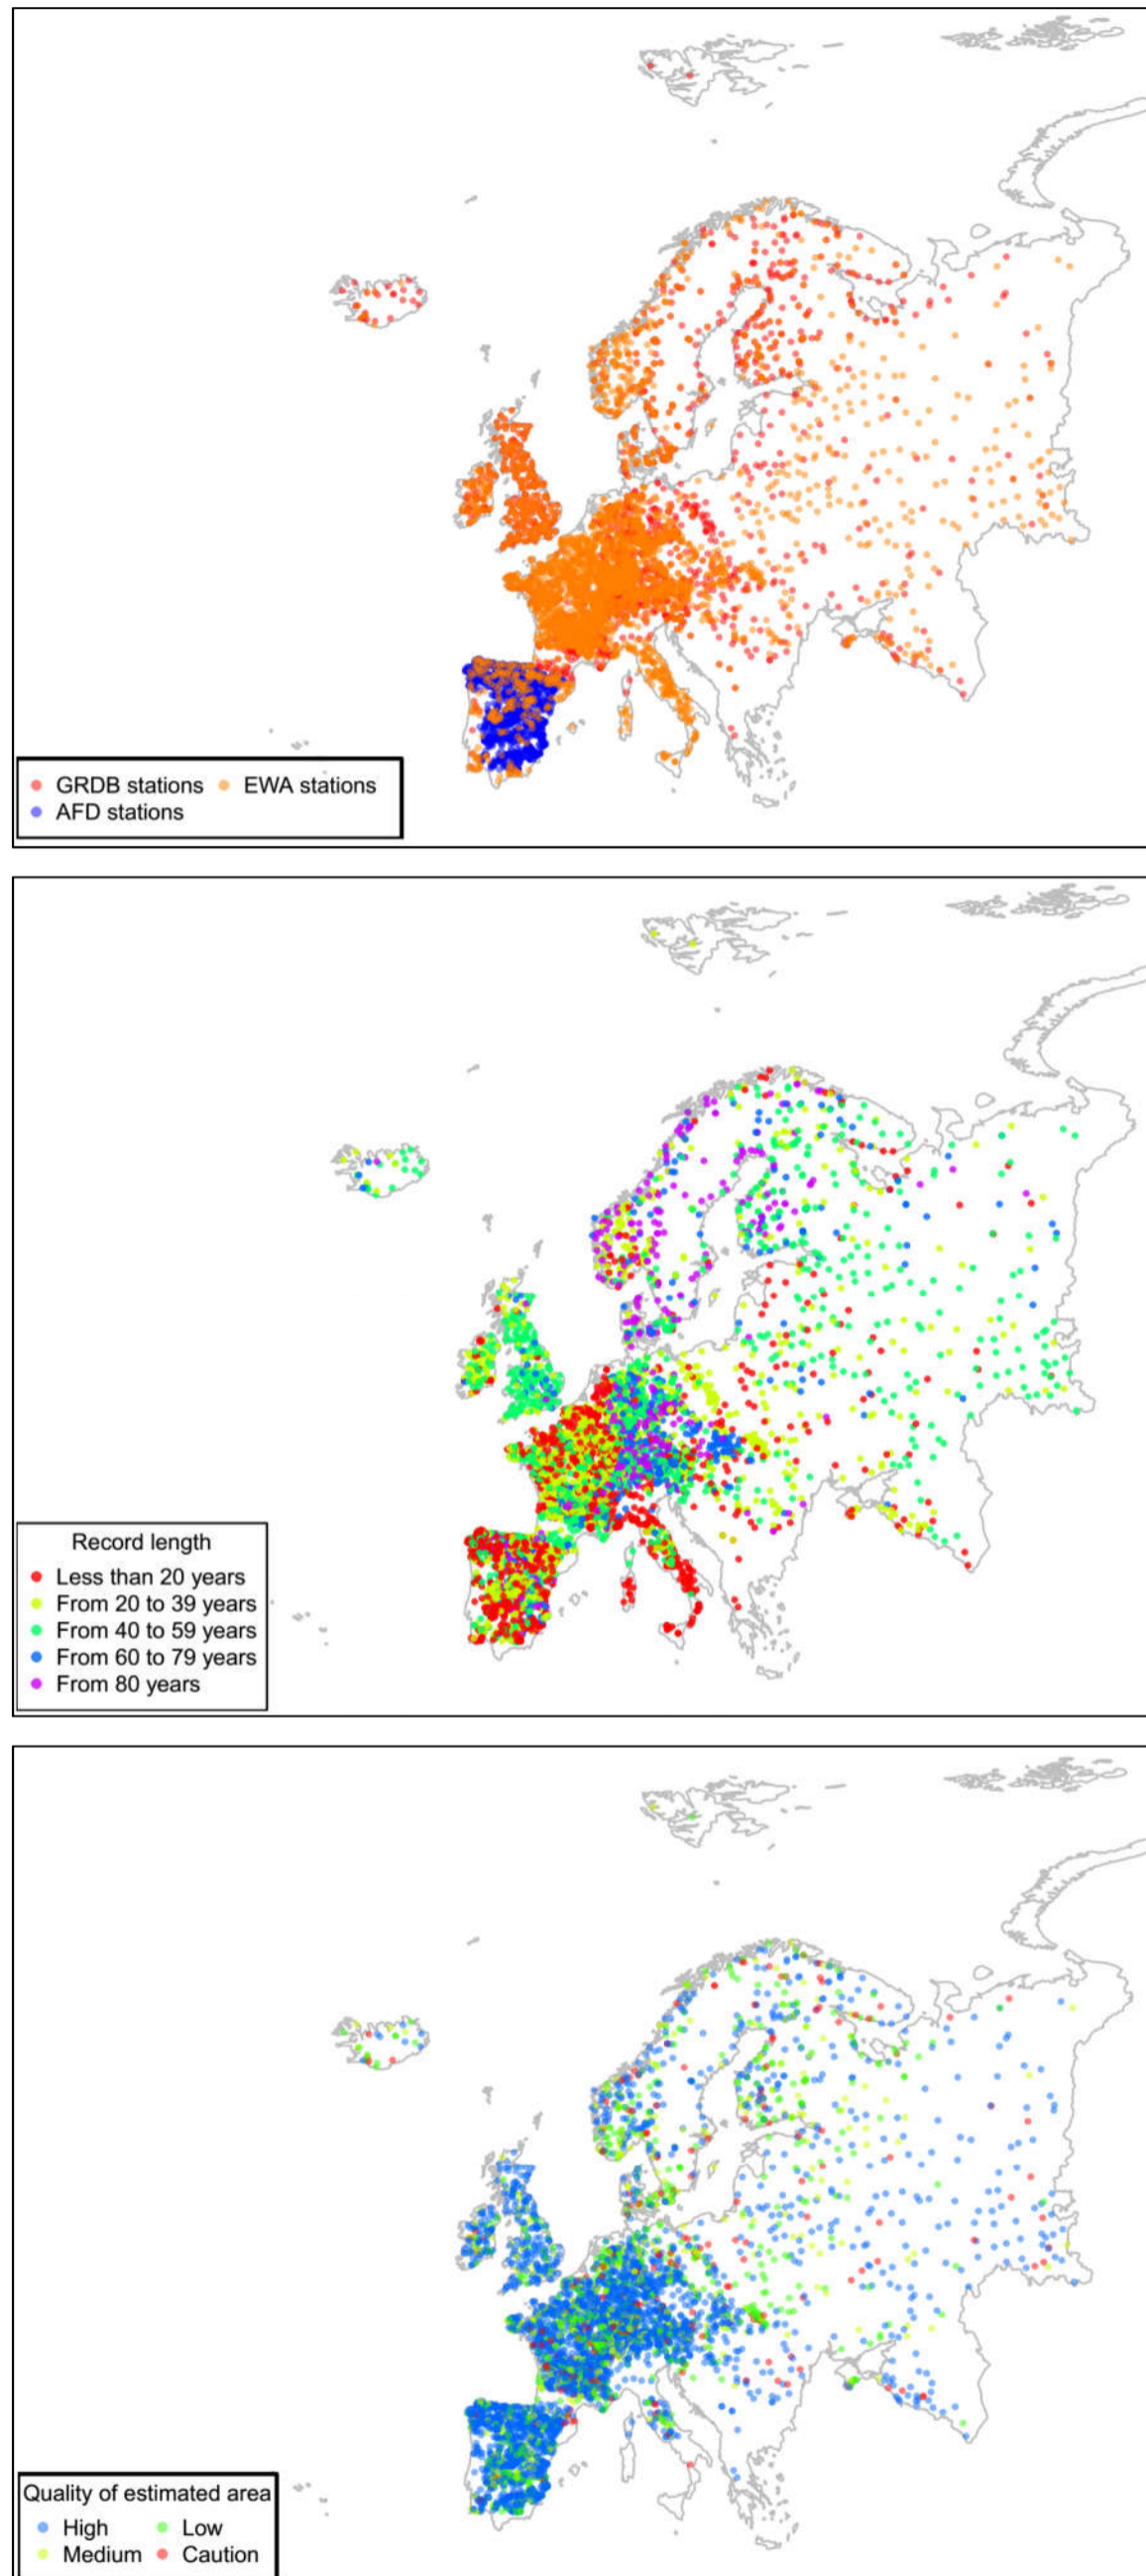

**Figure 2.** Overview of GSIM data product over Europe. Top panel: data sources for GSIM; middle panel: length of time series in GSIM database; lower panel: quality of catchment based on discrepancy between the reported catchment area and the delineated catchment area (only stations with reported catchment area have been shown).

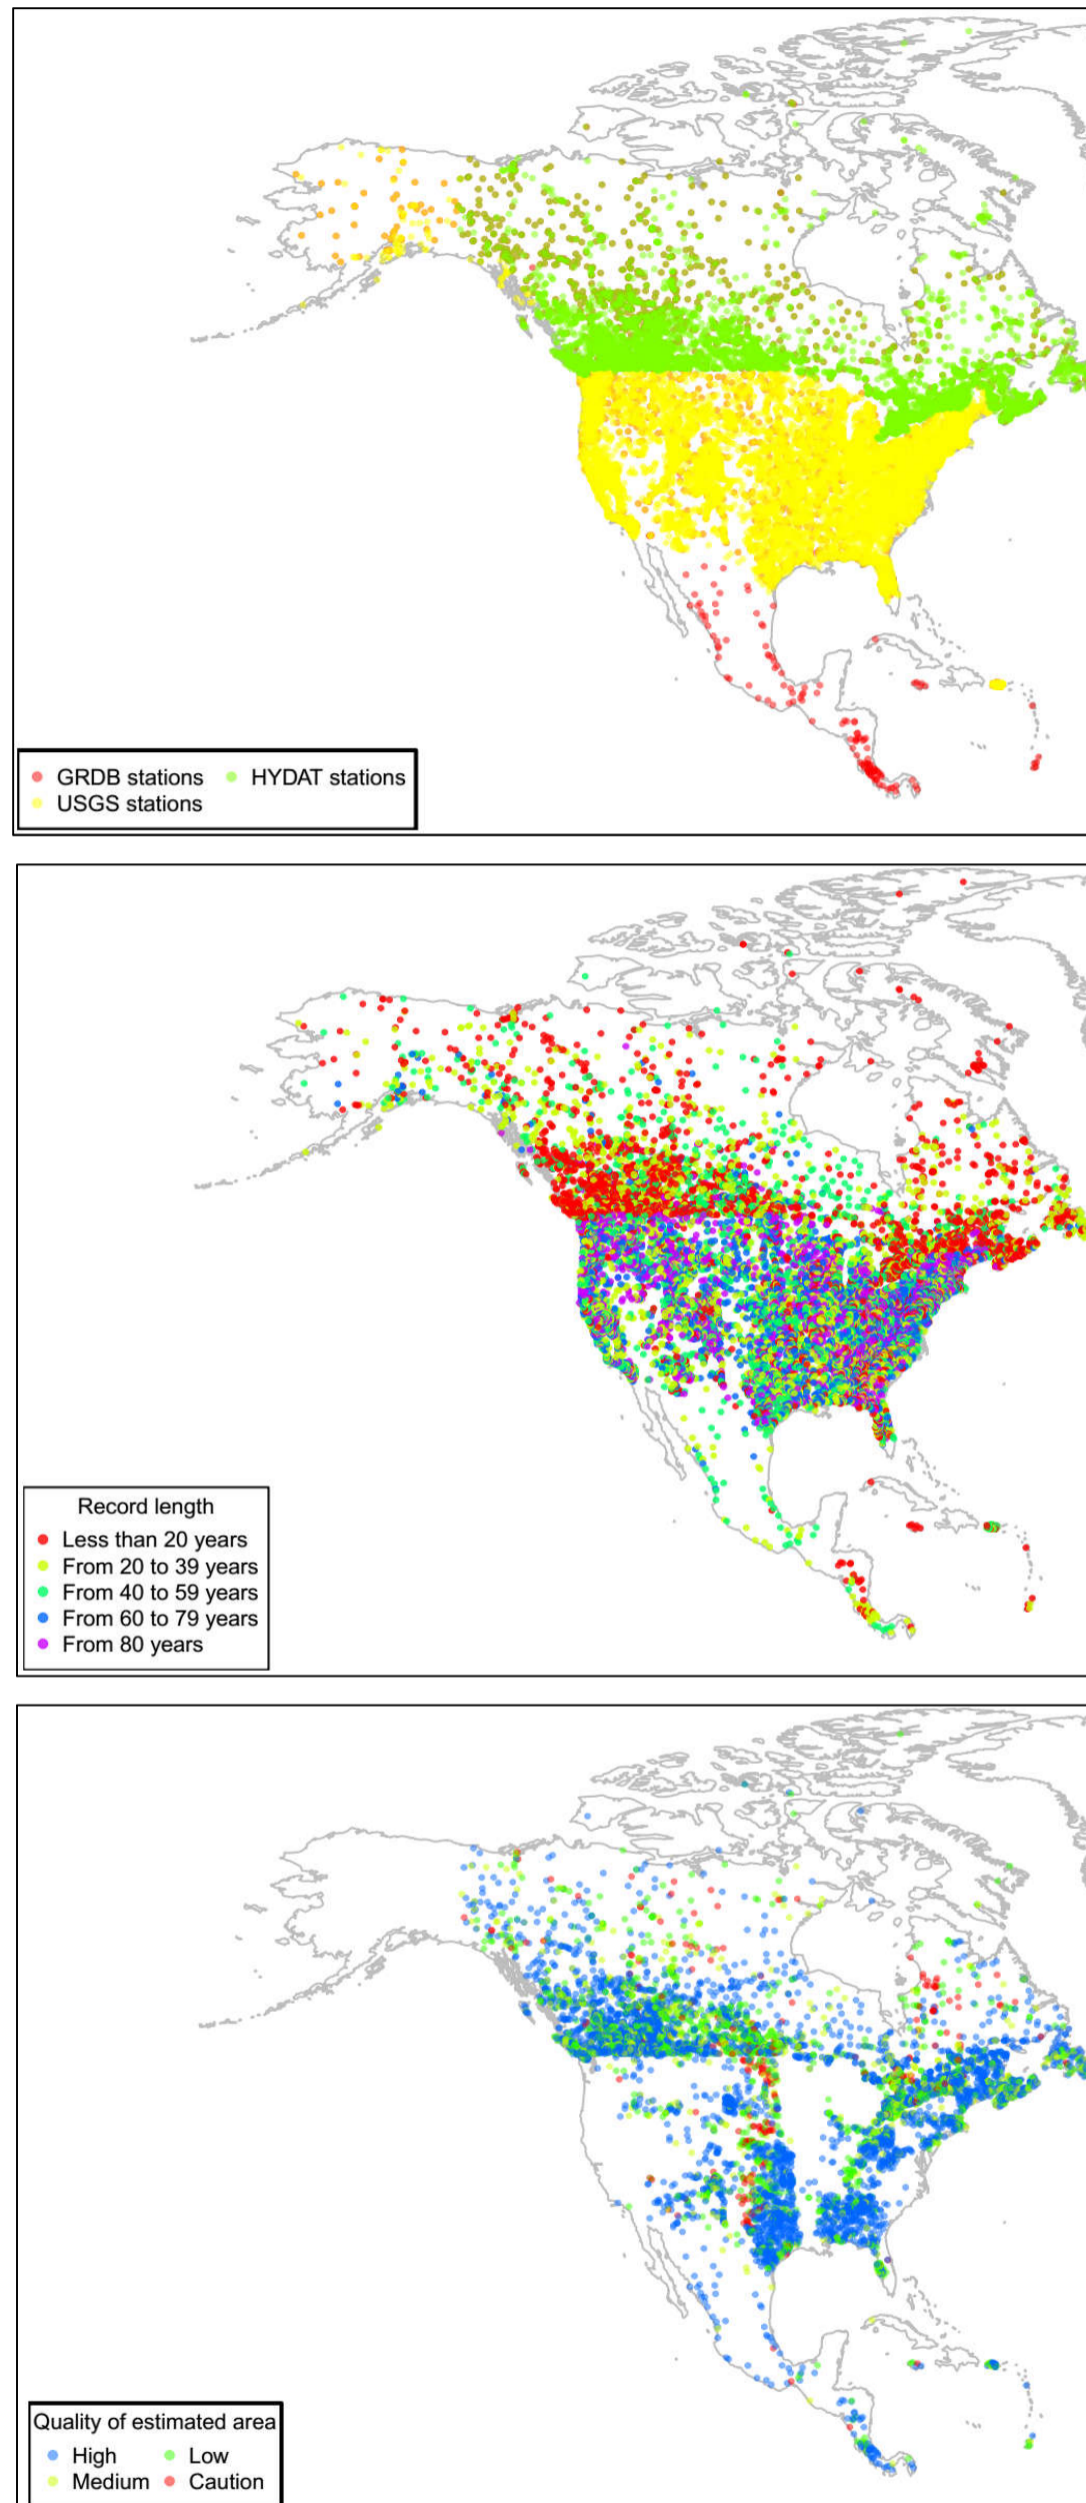

**Figure 3.** Overview of GSIM data product over North America. Top panel: data sources for GSIM; middle panel: length of time series in GSIM database; lower panel: quality of catchment based on discrepancy between the reported catchment area and the delineated catchment area (only stations with reported catchment area have been shown).

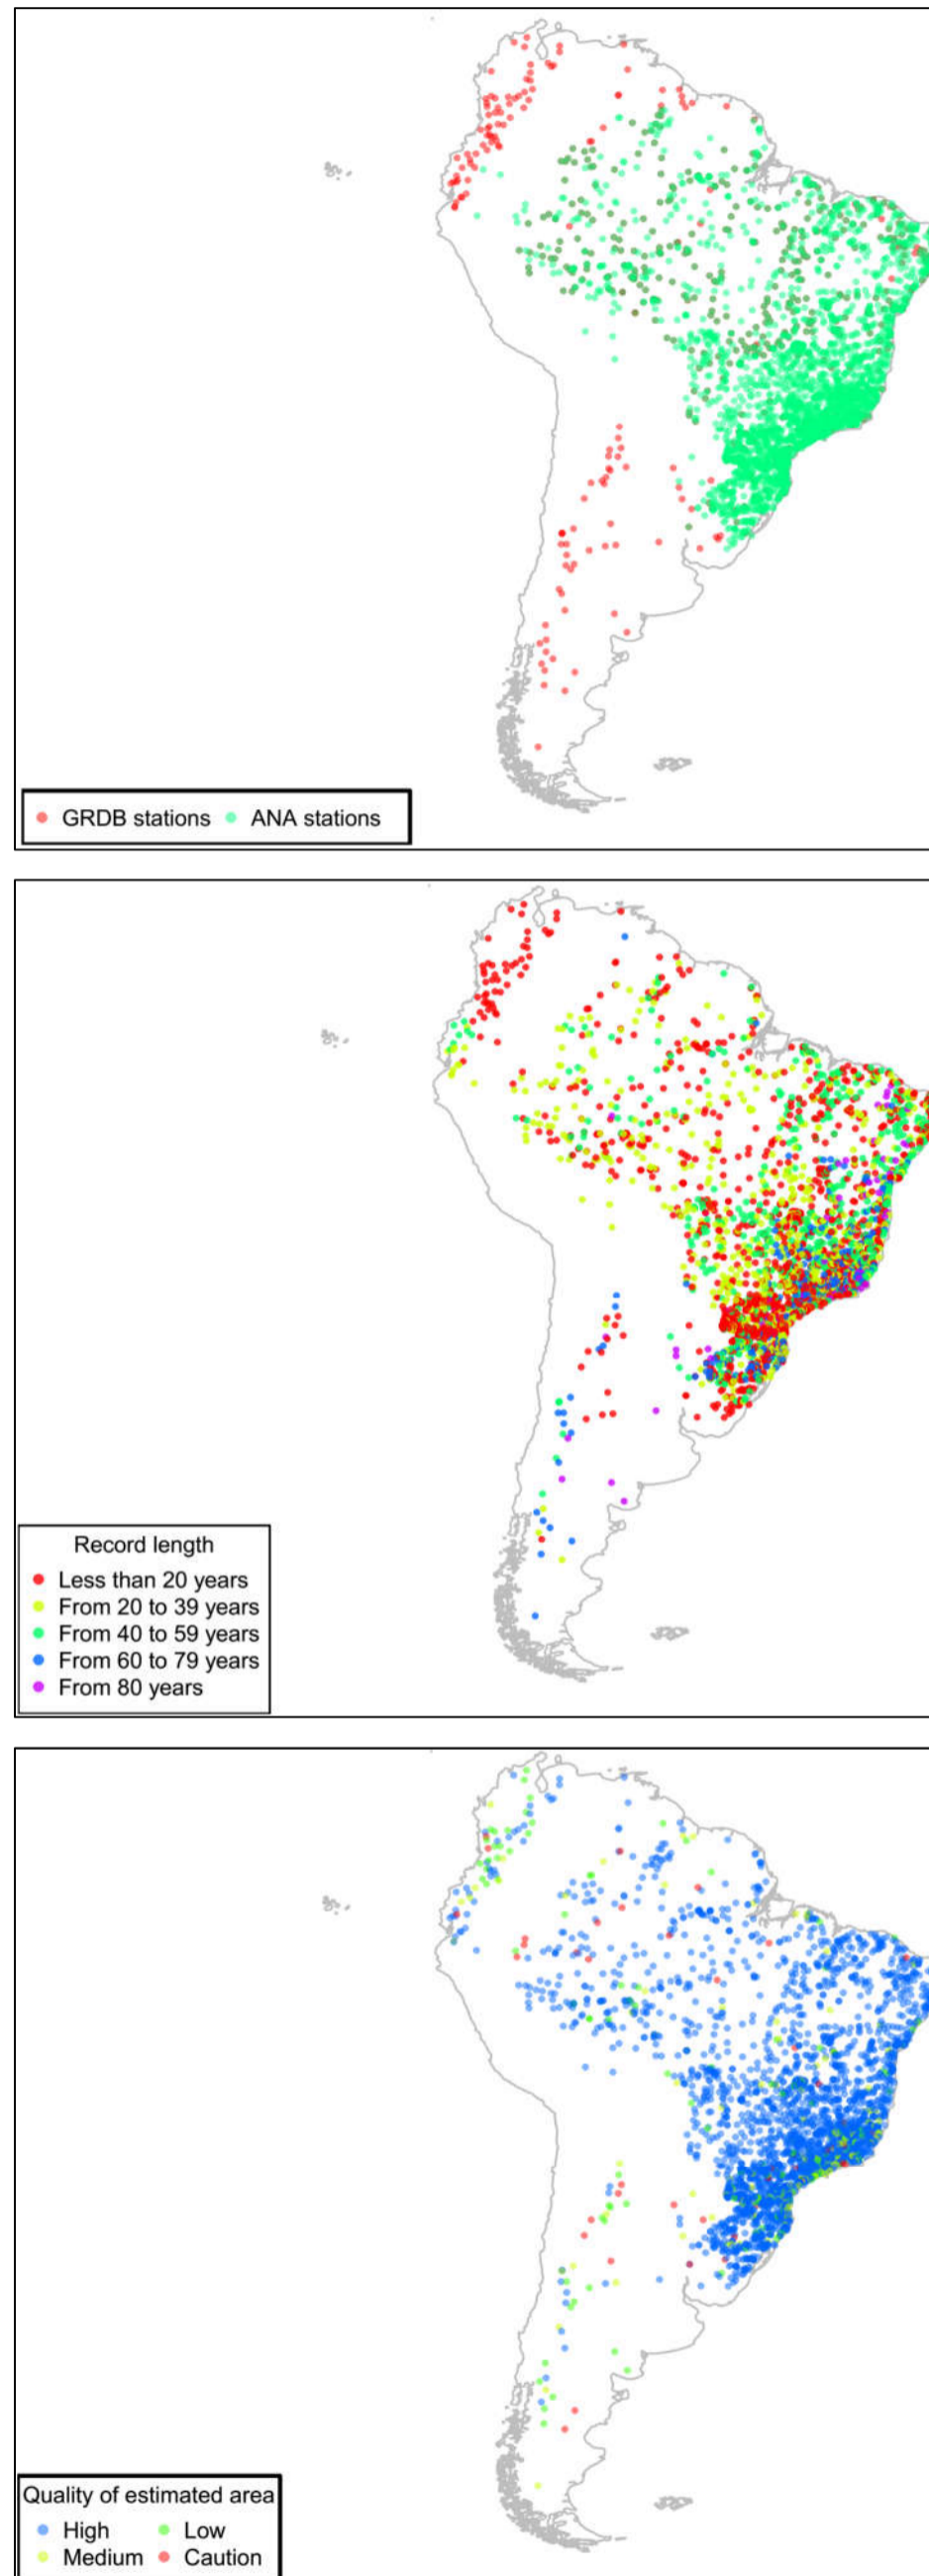

**Figure 4.** Overview of GSIM data product over South America. Top panel: data sources for GSIM; middle panel: length of time series in GSIM database; lower panel: quality of catchment based on discrepancy between the reported catchment area and the delineated catchment area (only stations with reported catchment area have been shown).

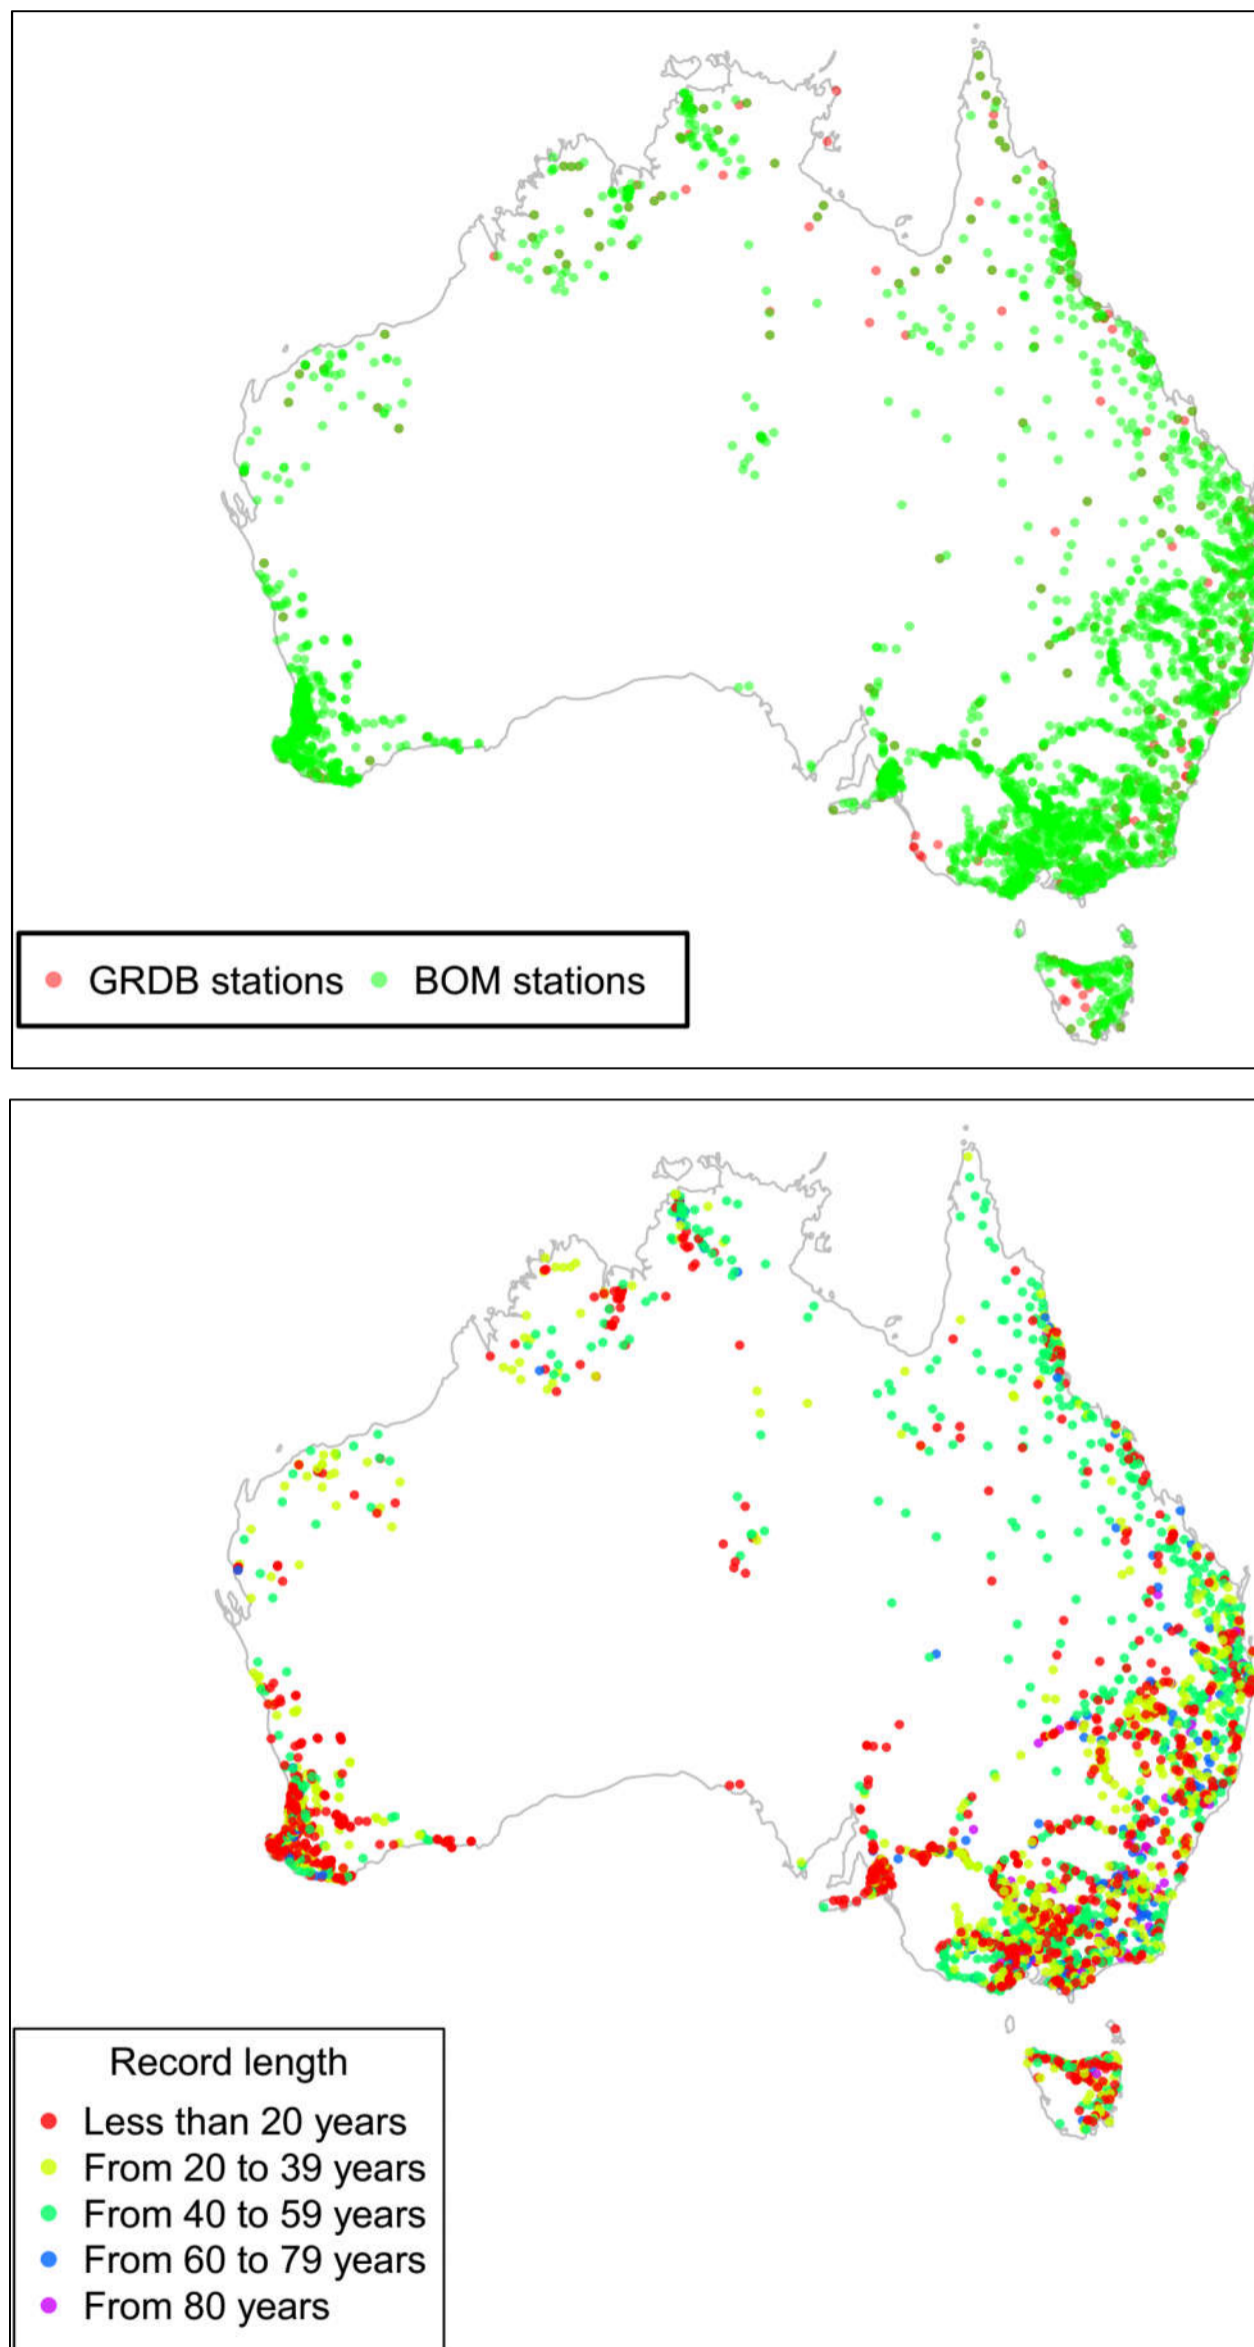

**Figure 5.** Overview of GSIM data product over Australia. Top panel: data sources for GSIM; lower panel: length of time series in GSIM database. As catchment area is not provided in the metadata of original data source, the figure for quality of delineated catchment was not shown here (and thus all catchments delineated in Australia are classified as “Caution”).
